# Supplementary material
Source: HighWire-hosted journal article supplement (http://cmajopen.ca/highwire/filestream/81031/field_highwire_adjunct_files/1/open-2016-0101-2-at.pdf)
Supplement: open-2016-0101-2-at.pdf [file open-2016-0101-2-at.pdf]

Appendix 2 (as supplied by the authors): Program overview

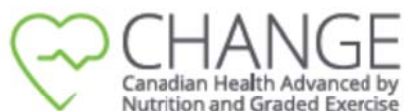

# Program Overview

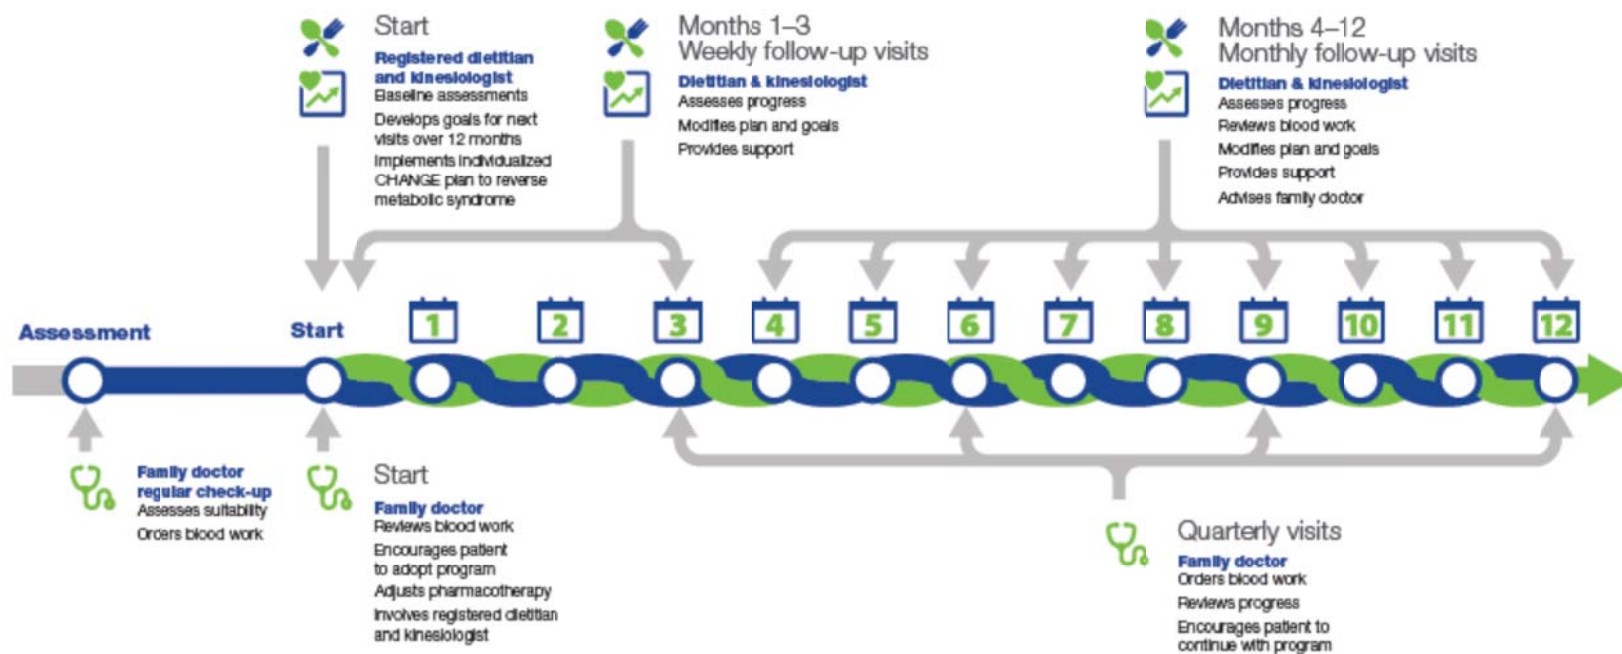

Appendix to: Jeejeebhoy K, Dhaliwal R, Heyland DK, et al. Family physician–led, team-based, lifestyle intervention in patients with metabolic syndrome: results of a multicentre feasibility project. *CMAJ Open* 2017. DOI:10.97788/cmajo.20160101
